# Supplementary material
Source: publisher site journal article supplement (https://www.e-cmh.org/upload/media/cmh-2022-0327-Supplementary-Table-2.pdf)
Supplement: Supplementary file 1 [file cmh-2022-0327-Supplementary-Table-2.pdf]

**Supplementary Table 2.** Sequences for siRNAs

| No.         | Sense (5'-3')           | Antisense (5'-3')       |       |
|-------------|-------------------------|-------------------------|-------|
| S1PR2 siRNA | CGUCCGAAUCUACUUUGUAdTdT | UACAAAGUAGAUUCGGACGdTdT | Mouse |
| S1PR2 siRNA | GACCAAGGAGACGCUGGACAUG  | CUGGUUCCUCUGCGACCUGUAC  | Human |
| YAP siRNA   | GAUGAAUUCUGCCUCAGGATT   | UCCUGAGGCAGAAUUCAUCTT   | Mouse |
